# Supplementary material for: A Skin-Conformal, Stretchable, and Breathable Fiducial Marker Patch for Surgical Navigation Systems
Source: MDPI journal article supplement (doi:10.3390/mi11020194), 2020-02-13
Supplement: s1 [file s1]

## Supplementary Materials: A Skin-Conformal, Stretchable, and Breathable Fiducial Marker Patch for Surgical Navigation Systems

Sangkyu Lee, Duhwan Seong, Jiyong Yoon, Sungjun Lee, Hyoung Won Baac, Deukhee Lee and Donghee Son

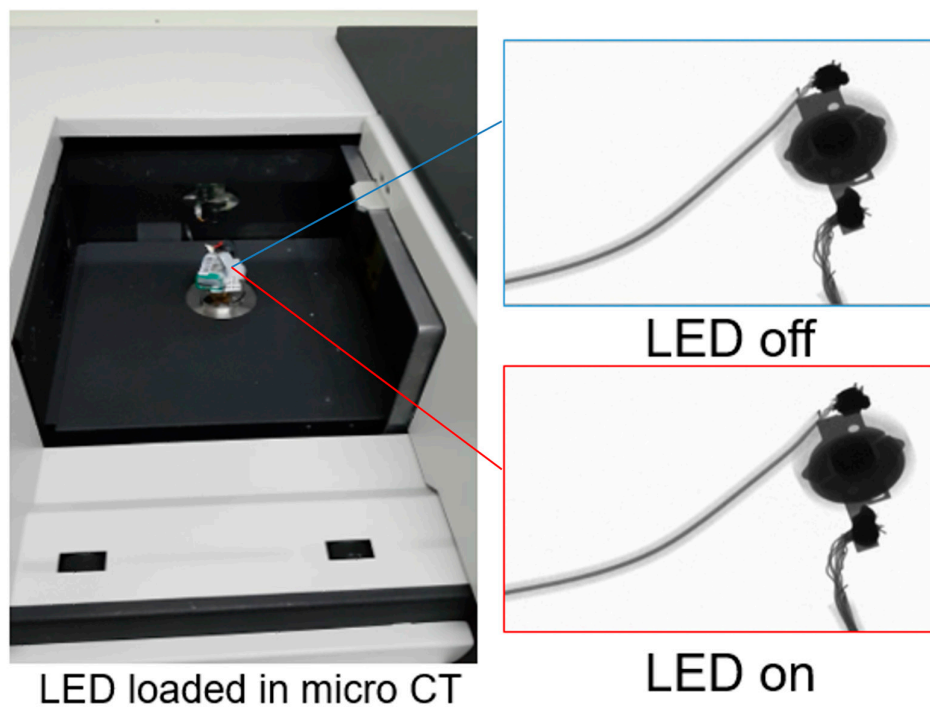

**Figure S1.** X-ray stability and recognition of the micro-IR LED with a micro-CT machine.
